# Supplementary material for: Building interpretable models for polypharmacy prediction in older chronic patients based on drug prescription records
Source: PeerJ. 2018 Oct 12;6:e5765. doi: 10.7717/peerj.5765 (PMC6187991; doi:10.7717/peerj.5765)
Supplement: Supplemental Information 2 — The file contains summary of results for CVD for all MND values (Overview tab). In addition, each MND=x tab contains all selected variables for maximal number of dimensions x. The + sign next to a variable name indicates a positive coefficient in the final model. [file peerj-06-5765-s002.xlsx]

## Sheet: Overview
Name	N	AUC	AUPRC	Sensitivity	Specificity	PPV	NPV	NumSelected	PercPos
MND=10	100	0.749 (0.743 - 0.754)	0.520 (0.514 - 0.526)	0.637 (0.623 - 0.651)	0.850 (0.846 - 0.855)	0.543 (0.538 - 0.547)	0.895 (0.892 - 0.898)	5.950 ( 5.702 - 6.198)	0.255 (0.249 - 0.262)
MND=20	100	0.875 (0.873 - 0.877)	0.607 (0.602 - 0.612)	0.886 (0.882 - 0.890)	0.780 (0.778 - 0.782)	0.528 (0.525 - 0.531)	0.961 (0.960 - 0.962)	16.550 ( 16.420 - 16.680)	0.364 (0.362 - 0.366)
MND=30	100	0.888 (0.886 - 0.890)	0.622 (0.617 - 0.627)	0.884 (0.880 - 0.888)	0.783 (0.780 - 0.786)	0.531 (0.528 - 0.534)	0.961 (0.959 - 0.962)	25.460 ( 25.168 - 25.752)	0.362 (0.359 - 0.364)
MND=40	100	0.893 (0.891 - 0.895)	0.628 (0.624 - 0.633)	0.881 (0.878 - 0.885)	0.788 (0.785 - 0.790)	0.536 (0.533 - 0.538)	0.960 (0.959 - 0.961)	31.780 ( 31.441 - 32.119)	0.357 (0.355 - 0.360)
MND=50	100	0.895 (0.893 - 0.896)	0.632 (0.627 - 0.637)	0.884 (0.880 - 0.887)	0.789 (0.787 - 0.792)	0.538 (0.535 - 0.541)	0.961 (0.960 - 0.962)	38.730 ( 38.242 - 39.218)	0.357 (0.355 - 0.359)
MND=60	100	0.896 (0.895 - 0.898)	0.634 (0.629 - 0.638)	0.885 (0.881 - 0.889)	0.789 (0.787 - 0.792)	0.538 (0.536 - 0.541)	0.961 (0.960 - 0.962)	44.660 ( 44.159 - 45.161)	0.357 (0.355 - 0.359)
MND=70	100	0.897 (0.896 - 0.899)	0.635 (0.630 - 0.640)	0.885 (0.882 - 0.889)	0.789 (0.787 - 0.792)	0.538 (0.536 - 0.541)	0.961 (0.960 - 0.962)	49.860 ( 49.269 - 50.451)	0.357 (0.355 - 0.359)
MND=80	100	0.898 (0.896 - 0.899)	0.636 (0.631 - 0.641)	0.885 (0.881 - 0.888)	0.789 (0.787 - 0.792)	0.538 (0.536 - 0.541)	0.961 (0.960 - 0.962)	55.310 ( 54.589 - 56.031)	0.357 (0.355 - 0.359)
MND=90	100	0.898 (0.897 - 0.900)	0.637 (0.632 - 0.642)	0.886 (0.883 - 0.890)	0.789 (0.786 - 0.791)	0.538 (0.535 - 0.541)	0.962 (0.960 - 0.963)	60.140 ( 59.350 - 60.930)	0.358 (0.356 - 0.360)
MND=100	100	0.899 (0.897 - 0.900)	0.637 (0.633 - 0.642)	0.888 (0.884 - 0.891)	0.788 (0.786 - 0.791)	0.538 (0.535 - 0.541)	0.962 (0.961 - 0.963)	65.240 ( 64.401 - 66.079)	0.358 (0.356 - 0.361)
NDR	100	0.900 (0.898 - 0.901)	0.640 (0.635 - 0.645)	0.875 (0.871 - 0.880)	0.793 (0.790 - 0.795)	0.539 (0.537 - 0.542)	0.958 (0.957 - 0.960)	142.310 (136.026 - 148.594)	0.352 (0.350 - 0.355)

## Sheet: MND=10
Feature	Freq
+A02	100
+M01	100
+N02	100
+N05	100
+G04	90
+N06	55
+A10	22
+C10	16
+S01	11
+A11	1

## Sheet: MND=20
Feature	Freq
+A02	100
+A10	100
+A11	100
+C03	100
+C10	100
+D07	100
+G04	100
+H03	100
+J01	100
+M01	100
+N02	100
+N05	100
+N06	100
+R03	100
+S01	100
-YearBirthPerson	95
+N03	54
+D01	2
+R06	2
+A06	1
+M05	1

## Sheet: MND=30
Feature	Freq
-YearBirthPerson	100
+A02	100
+A06	100
+A10	100
+A11	100
+C03	100
+C10	100
+D07	100
+G04	100
+H03	100
+J01	100
+M01	100
+N02	100
+N03	100
+N05	100
+N06	100
+R03	100
+S01	100
+R06	99
+D01	98
+M05	98
+G03	94
+L04	93
+R01	81
+M04	72
+M04AA01	58
+H02	39
+L02	6
+A12	4
+N04	2
+C03CA01	1
+hosp	1

## Sheet: MND=40
Feature	Freq
-YearBirthPerson	100
+A02	100
+A06	100
+A10	100
+A11	100
+C03	100
+C10	100
+D01	100
+D07	100
+G03	100
+G04	100
+H03	100
+J01	100
+L04	100
+M01	100
+M05	100
+N02	100
+N03	100
+N05	100
+N06	100
+R01	100
+R03	100
+R06	100
+S01	100
+M04	99
+H02	98
+M04AA01	92
+L02	90
+N04	87
+hosp	79
+A12	72
+B03	51
+C03CA01	42
+R03BB04	21
+S01ED51	13
+A06AD11	7
+A09	5
+N05CF02	5
+A07	4
+A11CC05	3
+A09AA02	2
+A12AA04	2
+G04CB01	2
+A10BB09	1
+B01	1
+H02AB04	1
+L01	1

## Sheet: MND=50
Feature	Freq
-YearBirthPerson	100
+A02	100
+A06	100
+A10	100
+A11	100
+C03	100
+C10	100
+D01	100
+D07	100
+G03	100
+G04	100
+H02	100
+H03	100
+hosp	100
+J01	100
+L04	100
+M01	100
+M04	100
+M05	100
+N02	100
+N03	100
+N05	100
+N06	100
+R01	100
+R03	100
+R06	100
+S01	100
+L02	99
+N04	99
+A12	92
+B03	91
+M04AA01	91
+C03CA01	85
+R03BB04	84
+A07	73
+S01ED51	65
+A09	64
+N05CF02	44
+A09AA02	41
+B01AF01	38
+A06AD11	31
+N07	29
+G04CB01	23
+L01	19
+A10BB09	15
+B01	15
+A11CC05	9
+N05AH04	9
+D06	8
+icd.L40	6
+A12AA04	5
+G01	5
+J05	4
+N06AX16	4
+R06AX27	4
+C03DA01	3
+D07AB02	3
+H02AB04	3
+R03AK07	3
+S01EE01	3
+A10AD05	2
+B03AB05	1
+C10AA03	1
+L01BA01	1
+N02BE01	1

## Sheet: MND=60
Feature	Freq
-YearBirthPerson	100
+A02	100
+A06	100
+A10	100
+A11	100
+C03	100
+C10	100
+D01	100
+D07	100
+G03	100
+G04	100
+H02	100
+H03	100
+hosp	100
+J01	100
+L02	100
+L04	100
+M01	100
+M04	100
+M05	100
+N02	100
+N03	100
+N04	100
+N05	100
+N06	100
+R01	100
+R03	100
+R03BB04	100
+R06	100
+S01	100
+B03	98
+M04AA01	95
+S01ED51	95
+A12	94
+A09	93
+C03CA01	93
+A07	90
+N07	72
+B01AF01	71
+N05CF02	67
+A09AA02	62
+L01	52
+G04CB01	51
+L01BA01	44
+A06AD11	43
+D06	43
+A10BB09	40
+B01	32
+J05	27
+G01	21
+S01EE01	19
+D07AB02	16
+N05AH04	16
+N06AX16	16
+A11CC05	14
+A10AD05	13
+R03AK07	12
+A12AA04	11
+icd.L40	10
+R06AX27	10
+C03DA01	8
+N02BE01	5
+R03AK08	5
+B03AB05	4
+C10AA03	4
+icd.I26	4
+D01AC01	3
+H02AB04	3
+J01EE01	2
+N06DA02	2
+D02	1
+G01AF04	1
+icd.C13	1
+L02BB03	1
+N04BA02	1
+S01XA20	1

## Sheet: MND=70
Feature	Freq
-YearBirthPerson	100
+A02	100
+A06	100
+A10	100
+A11	100
+C03	100
+C10	100
+D01	100
+D07	100
+G03	100
+G04	100
+H02	100
+H03	100
+hosp	100
+J01	100
+L02	100
+L04	100
+M01	100
+M04	100
+M05	100
+N02	100
+N03	100
+N04	100
+N05	100
+N06	100
+R01	100
+R03	100
+R03BB04	100
+R06	100
+S01	100
+A09	99
+S01ED51	99
+B03	98
+C03CA01	98
+A07	96
+A12	94
+M04AA01	94
+N07	94
+N05CF02	86
+B01AF01	84
+A09AA02	83
+D06	79
+G04CB01	75
+L01BA01	68
+L01	64
+J05	62
+A06AD11	57
+A10BB09	55
+B01	44
+N06AX16	43
+D07AB02	38
+G01	38
+S01EE01	36
+R03AK07	35
+icd.L40	33
+N05AH04	28
+A10AD05	27
+R06AX27	22
+C10AA03	18
+icd.I26	18
+A11CC05	15
+A12AA04	14
+C03DA01	13
+R03AK08	12
+B03AB05	7
+N02BE01	7
+D01AC01	6
+J01EE01	6
+N06DA02	6
+icd.C13	5
+L03	5
+H02AB04	3
+D02	2
+G01AF04	2
+G03FA	2
+N04BA02	2
+S01EE03	2
-GenderPerson	1
+B01AX05	1
+D02AE01	1
+H03AA01	1
+icd.E05	1
+J01FA09	1
+L02BB03	1
+N07CA01	1
+R01AD09	1
+R06AE07	1
+R06AE09	1
+S01XA20	1

## Sheet: MND=80
Feature	Freq
-YearBirthPerson	100
+A02	100
+A06	100
+A09	100
+A10	100
+A11	100
+C03	100
+C10	100
+D01	100
+D07	100
+G03	100
+G04	100
+H02	100
+H03	100
+hosp	100
+J01	100
+L02	100
+L04	100
+M01	100
+M04	100
+M05	100
+N02	100
+N03	100
+N04	100
+N05	100
+N06	100
+R01	100
+R03	100
+R03BB04	100
+R06	100
+S01	100
+S01ED51	100
+B03	99
+C03CA01	99
+N07	99
+A07	97
+N05CF02	97
+A12	92
+D06	92
+M04AA01	92
+B01AF01	91
+G04CB01	87
+A09AA02	84
+J05	82
+L01BA01	79
+L01	70
+A10BB09	64
+G01	63
+L03	63
+N06AX16	63
+A06AD11	62
+icd.L40	57
+R03AK07	56
+D07AB02	55
+B01	53
+S01EE01	53
+A10AD05	52
+N05AH04	46
+C10AA03	44
+icd.I26	34
+R06AX27	34
+C03DA01	26
+B03AB05	25
+R03AK08	24
+A11CC05	19
+A12AA04	17
+N05AD01	15
+N06DA02	14
+J01EE01	11
+D01AC01	9
+G03FA	9
+N02BE01	9
+C05AX03	8
+S01EE03	7
-GenderPerson	6
+icd.C13	6
+B01AX05	5
+D02	5
+N04BA02	5
+S01XA20	5
+G01AF04	4
+J01FA09	4
+V06	4
+D02AE01	3
+H02AB04	3
+icd.E05	3
-D07AB10	2
+J05AF10	2
+L02BB03	2
+N02CC03	2
+R03BA07	2
+R06AE09	2
+S01BC11	2
+V06DB	2
-S01AA01	1
+D06BX01	1
+D07AC01	1
+H03AA01	1
+icd.S06	1
+N04AA02	1
+N06AX21	1
+N07CA01	1
+R01AD09	1
+R06AE07	1

## Sheet: MND=90
Feature	Freq
-YearBirthPerson	100
+A02	100
+A06	100
+A09	100
+A10	100
+A11	100
+C03	100
+C10	100
+D01	100
+D07	100
+G03	100
+G04	100
+H02	100
+H03	100
+hosp	100
+J01	100
+L02	100
+L04	100
+M01	100
+M04	100
+M05	100
+N02	100
+N03	100
+N04	100
+N05	100
+N06	100
+R01	100
+R03	100
+R03BB04	100
+R06	100
+S01	100
+S01ED51	100
+B03	99
+C03CA01	99
+N07	99
+A07	98
+N05CF02	98
+D06	96
+B01AF01	95
+G04CB01	94
+A12	92
+M04AA01	92
+J05	89
+L01BA01	88
+A09AA02	83
+L03	83
+G01	76
+L01	76
+N06AX16	76
+A10BB09	74
+A06AD11	70
+C10AA03	70
+D07AB02	70
+R03AK07	68
+S01EE01	66
+A10AD05	63
+icd.L40	63
+N05AH04	57
+B01	56
+icd.I26	46
+R06AX27	43
+N05AD01	40
+R03AK08	40
+C03DA01	33
+B03AB05	32
+R03BA07	28
+A11CC05	24
+A12AA04	22
+N06DA02	21
+B01AX05	20
-GenderPerson	18
+J05AF10	18
+J01EE01	16
+G03FA	14
+D01AC01	13
+D02	12
+H01	11
+N02BE01	11
+S01XA20	11
+G01AF04	10
+V06	9
+C05AX03	8
+D02AE01	8
+N04BA02	8
+N02CC03	7
+S01EE03	7
-S01AA01	6
+icd.C13	6
+R01AD08	6
+G01AX11	5
+J01FA09	5
+V06DB	5
-D07AB10	4
+icd.E05	4
+R06AE09	4
+S01BC11	4
+G03HA01	3
+H02AB04	3
+icd.N35	3
+N05AH02	3
+R01AD09	3
+R06AE07	3
+A01	2
+D07AC01	2
+H01BA02	2
+icd.E10	2
+icd.S06	2
+J01DC02	2
+L02BB03	2
+N05AX08	2
+N07CA02	2
-N06AX05	1
+D06BX01	1
+H03AA01	1
+icd.M17	1
+N04AA02	1
+N06AX14	1
+N06AX21	1
+N07CA01	1
+R03AK06	1

[truncated: 2 more sheets: MND=100, NDR]
